# Supplementary material
Source: HighWire-hosted journal article supplement (https://thorax.bmj.com/highwire/filestream/174366/field_highwire_adjunct_files/2/Thorax_Figure3_136879.doc.docx)
Supplement: Thorax_Figure3_136879.doc.docx [file Thorax_Figure3_136879.doc.docx]

Supplementary information results 3.2i Figure 3, Cohen Kappa scores between pESS and ESS item scores. Median kappa statistic = 0.63 (IQR 0.04).
